# Supplementary material
Source: PubMed Central journal article supplement (PMC546421)

## Supplemental table 1

### Blood Lineage Counts for the Reconstituted Mice

| Parameter    | Whole blood cells counts                         |                                                  |                                                     |                                        |
|--------------|--------------------------------------------------|--------------------------------------------------|-----------------------------------------------------|----------------------------------------|
|              | <i>irel</i> $\alpha^{-/-}$<br>reconstituted mice | <i>irel</i> $\alpha^{+/+}$<br>reconstituted mice | Control 1: <i>rag2</i> $^{-/-}$<br>(non-irradiated) | Control 2: wild-type<br>C57B/129S mice |
| WBC (K/uL)   | 5.97 $\pm$ 2.1                                   | 7.12 $\pm$ 2.5                                   | 5.12 $\pm$ 1.7                                      | 14.0 $\pm$ 2.3                         |
| NE (K/uL; %) | 4.2 $\pm$ 0.9;<br>70.4 $\pm$ 2.4                 | 3.92 $\pm$ 0.8 ;<br>55 $\pm$ 1.5                 | 3.93 $\pm$ 0.6;<br>76.8 $\pm$ 3.5                   | 3.59 $\pm$ 1.0 ;<br>25.6 $\pm$ 0.9     |
| LY (K/uL; %) | 1.44 $\pm$ 0.6;<br>24.1 $\pm$ 3.7                | 2.75 $\pm$ 1.3;<br>38.7 $\pm$ 5.9                | 0.73 $\pm$ 0.2;<br>14.2 $\pm$ 1.3                   | 10.10 $\pm$ 4.5;<br>72.3 $\pm$ 10.1    |
| MO (K/uL; %) | 0.13 $\pm$ 0.05;<br>2.2 $\pm$ 0.3                | 0.29 $\pm$ 0.06;<br>4.1 $\pm$ 0.9                | 0.22 $\pm$ 0.05;<br>4.3 $\pm$ 0.8                   | 0.13 $\pm$ 0.07;<br>0.9 $\pm$ 0.4      |
| EO (K/uL; %) | 0.16 $\pm$ 0.1;<br>2.7 $\pm$ 1.7                 | 0.14 $\pm$ 0.09;<br>1.9 $\pm$ 0.9                | 0.18 $\pm$ 0.06;<br>3.5 $\pm$ 1.7                   | 0.12 $\pm$ 0.08;<br>0.9 $\pm$ 0.5      |
| BA (K/uL; %) | 0.04 $\pm$ 0.02;<br>0.67 $\pm$ 0.3               | 0.02 $\pm$ 0.01;<br>0.3 $\pm$ 0.19               | 0.06 $\pm$ 0.01;<br>1.2 $\pm$ 0.4                   | 0.04 $\pm$ 0.02;<br>0.3 $\pm$ 0.2      |
| RBC (M/uL)   | 5.24 $\pm$ 1.2                                   | 8.17 $\pm$ 1.5                                   | 9.54 $\pm$ 1.9                                      | 8.80 $\pm$ 2.0                         |
| HB (g/dL)    | 5.3 $\pm$ 1.3                                    | 12.9 $\pm$ 2.4                                   | 14.9 $\pm$ 2.0                                      | 14.0 $\pm$ 2.6                         |
| PLT (K/uL)   | 403 $\pm$ 51                                     | 461 $\pm$ 55                                     | 608 $\pm$ 49                                        | 586 $\pm$ 67                           |

**Note:** Mice whole blood counts were determined by using the Drew Scientific HEMAVET Multispecies Hematology Analyzer according to the manufacturer's instructions (Delta Scientific, Inc).

WBC, White blood cell or leukocyte count; NE, Neutrophil count and percent;  
LY, lymphocyte count and percent; MO, monocyte count and percent;  
EO, eosinophil count and percent; BA, basophil count and percent;  
RBC, red blood cell and/or erythrocyte count;  
HB, hemoglobin concentration; PLT, platelet and/or thrombocyte count

## Legend for supplemental figure 1

The *ire1 $\alpha$ <sup>-/-</sup>* fetal hematopoietic cells ( $4 \times 10^6$ ) and *rag2<sup>-/-</sup>* bone marrow cells ( $2 \times 10^5$ ) were co-transferred intravenously into lethally-irradiated *rag2<sup>-/-</sup>* mice for long-term reconstitution. All the reconstituted mice survived more than 2 months after transplantation. Blood serum, splenocytes, thymocytes and genomic DNA of various organs from the reconstituted mice were collected for the following analysis. **(A)** Reconstitution of serum IgM and IgG1 in *ire1 $\alpha$ <sup>+/+</sup>rag2<sup>-/-</sup>*, *ire1 $\alpha$ <sup>+/-</sup>rag2<sup>-/-</sup>* and *ire1 $\alpha$ <sup>-/-</sup>rag2<sup>-/-</sup>* chimaeric mice. Blood serum samples were collected from snipped tails of reconstituted *rag2<sup>-/-</sup>* mice. Levels of serum IgM and IgG1 were determined by ELISA. The *ire1 $\alpha$ <sup>+/+</sup>* hematopoietic cells reconstituted significant levels of serum IgM and IgG1 in the *rag2<sup>-/-</sup>* chimaeric mice. In contrast, no serum IgM and IgG1 was detected in the *ire1 $\alpha$ <sup>-/-</sup>* reconstituted *rag2<sup>-/-</sup>* mice up to 2 months after transplantation. **(B)** FACS analysis with B220, IgM, CD4, and CD8 of splenocytes or thymocytes from the *ire1 $\alpha$ <sup>+/+</sup>rag2<sup>-/-</sup>* and *ire1 $\alpha$ <sup>-/-</sup>rag2<sup>-/-</sup>* chimaeric mice. Neither B220<sup>+</sup>IgM<sup>+</sup> splenic B cells nor CD4<sup>+</sup> or CD8<sup>+</sup> T cells were detected in the *ire1 $\alpha$ <sup>-/-</sup>* reconstituted mice. **(C)** Quantification of rates of engraftment of *ire1 $\alpha$ <sup>-/-</sup>* or *ire1 $\alpha$ <sup>+/-</sup>* cells in the peripheral lymphoid organs after two and half months of reconstitution by Southern blot analysis. The phenotypes of *ire1 $\alpha$ <sup>+/-</sup>* reconstituted mice, including serum Ig levels and mature B and T cells in the peripheral lymphoid organs, were similar to those of *ire1 $\alpha$ <sup>+/+</sup>* mice. Since both *ire1 $\alpha$ <sup>-/-</sup>* and *ire1 $\alpha$ <sup>+/-</sup>* cells have the *ire1 $\alpha$*  recombinant allele integrated in their genomes that can be detected by a specific probe (see methods), we utilized *ire1 $\alpha$ <sup>+/-</sup>rag2<sup>-/-</sup>* chimaeric mice in place for

*irelα<sup>+/+</sup>rag2<sup>-/-</sup>* chimaeric mice in comparing the engraftment rates of external hematopoietic cells. The amounts of the reconstituted *irelα<sup>-/-</sup>* or *irelα<sup>+/-</sup>* cells in the reconstituted bone marrow, spleen and thymus were determined by quantification of *irelα* recombinant allele in the genomic DNA isolated from those organs. The engraftment rate of *irelα<sup>-/-</sup>* cells in bone marrow was comparable to that of *irelα<sup>+/-</sup>*, while very few *irelα<sup>-/-</sup>* cells could be detected in the spleen and thymus of the *irelα<sup>-/-</sup>* reconstituted mice. Rec. allele, *irelα* recombinant allele; WT allele, wild-type *irelα* allele. For panels A-C, representative data from at least 3 separate experiments are shown.

**A**

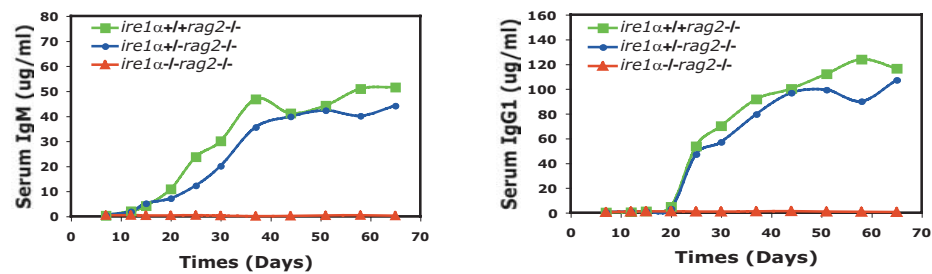

**B**

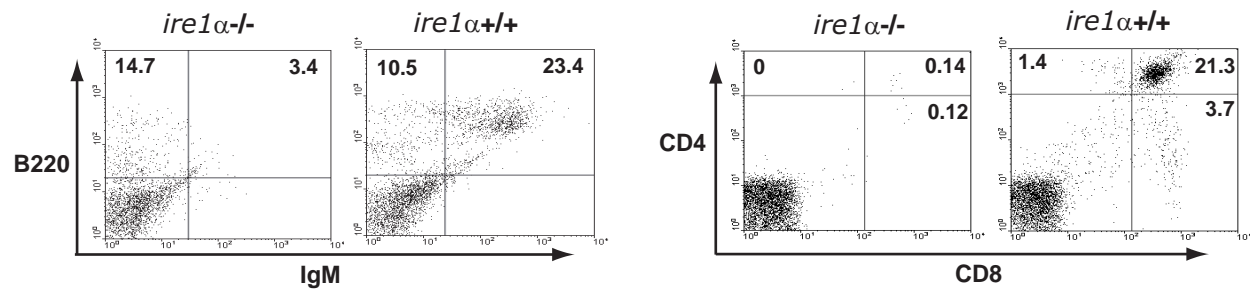

**C**

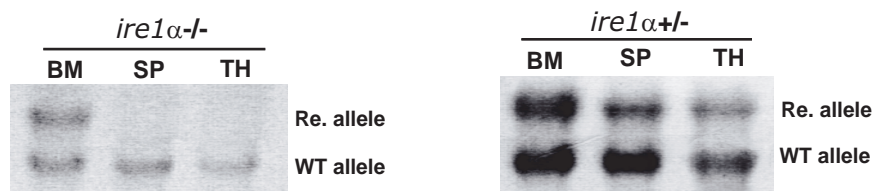

Supplement: JCI0521848sd.pdf [file JCI0521848sd.pdf]
